# Supplementary material for: Modelling Soil Water, Salt and Heat Dynamics under Partially Mulched Conditions with Drip Irrigation, Using HYDRUS-2D
Source: MDPI journal article supplement (doi:10.3390/w14182791), 2022-09-08
Supplement: s1 [file s1]

Archive with 1 entries (1 files):
- water-1863860-supplementary.pdf
