# Supplementary material for: Modelling Soil Water, Salt and Heat Dynamics under Partially Mulched Conditions with Drip Irrigation, Using HYDRUS-2D
Source: MDPI journal article supplement (doi:10.3390/w14182791), 2022-09-08
Supplement: s1 [file s1 › water-1863860-supplementary.pdf]

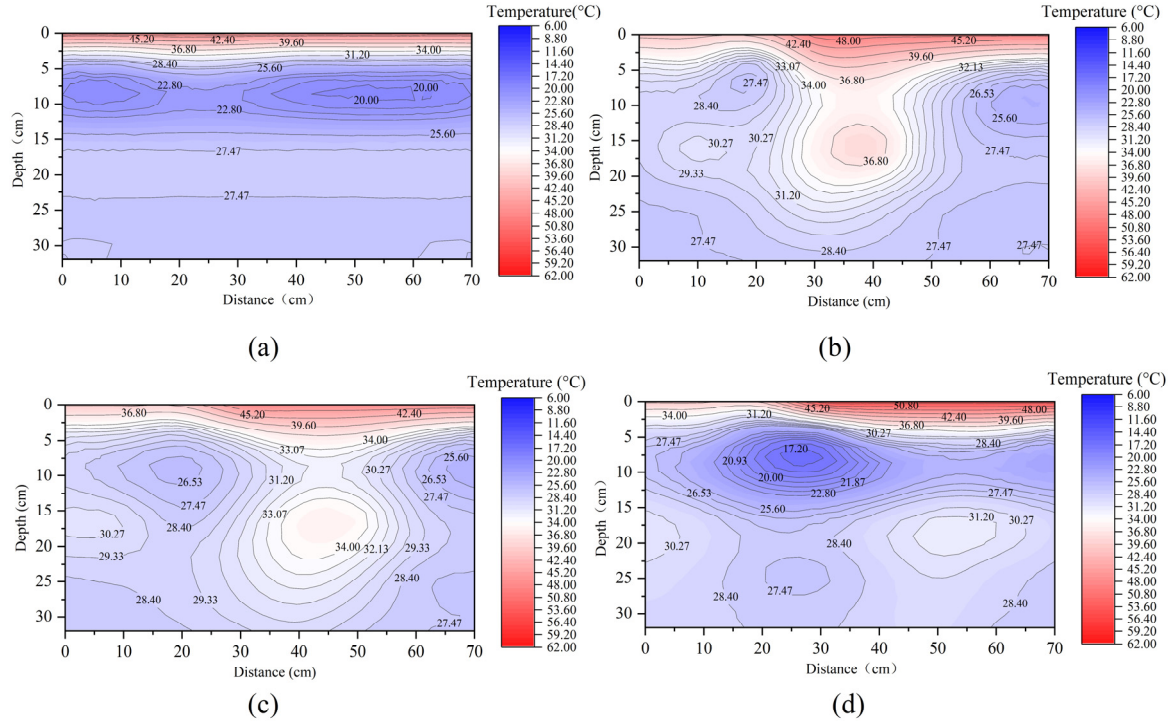

Figure S1: Simulated contours for temperature under W1:(a) The simulated result in the middle of first irrigation; (b) simulated result in the middle of fifth irrigation; (c) simulated result in the middle of fifth irrigation; (d) simulated result at the end of experiment;

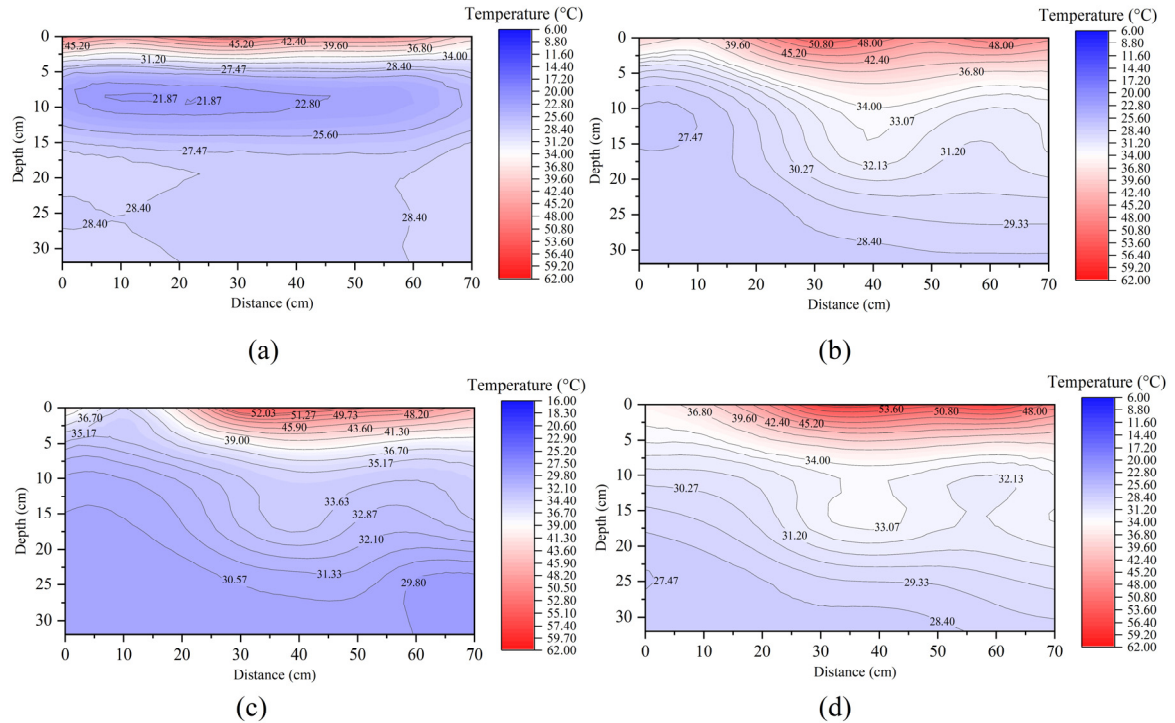

Figure S2: Measured temperature contour under W1: (a) The measured result in the middle of the first irrigation; (b) the middle of third irrigation; (c) the middle of the fifth irrigation; (d) at the end of experiment title;

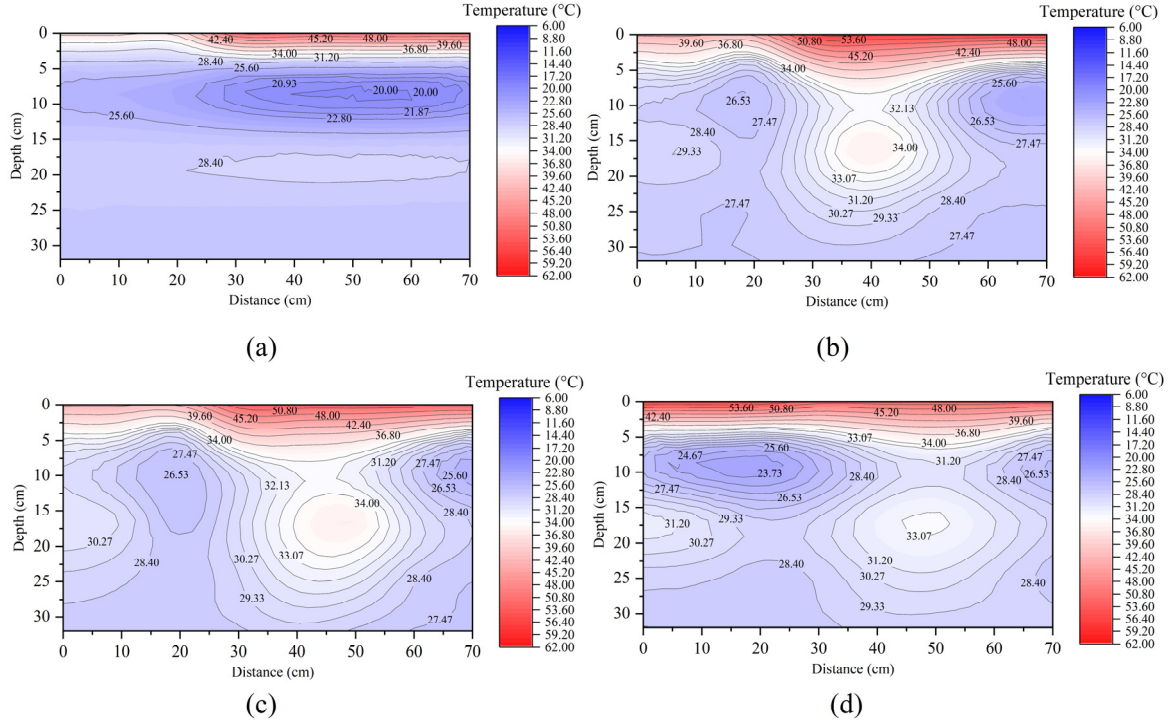

Figure S3: Simulated contour of temperature under W2: (a) The simulated result in the middle of the first irrigation; (b) simulated result in the middle of the third irrigation; (c) simulated result in the middle of the fifth irrigation; (d) simulated result at the end of experiment;

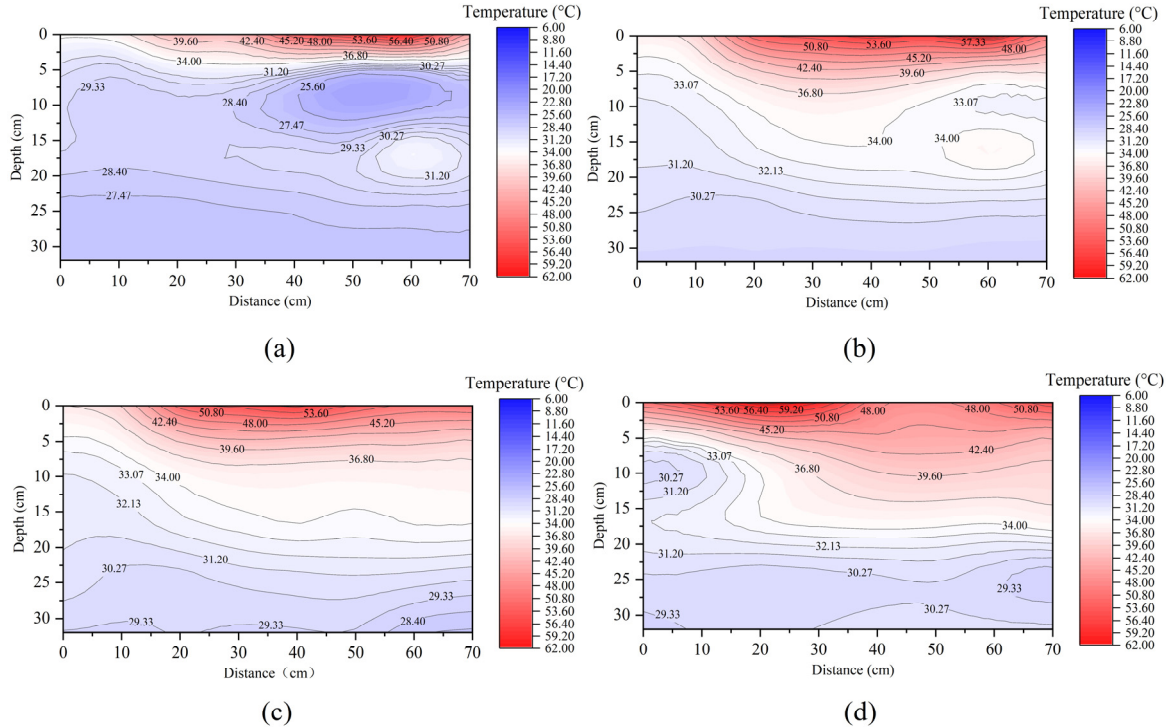

Figure S4: Measured contour of temperature under W2: (a) The measured result in the middle of the first irrigation; (b) the middle of the third irrigation; (c) the middle of the fifth irrigation; (d) measured result at the end of experiment.
